# Supplementary material for: Structural basis for impairment of DNA methylation by the DNMT3A R882H mutation
Source: PubMed Central journal article supplement (PMC7210271; doi:10.1038/s41467-020-16213-9), 2020-05-08
Supplement: 41467_2020_16213_MOESM1_ESM.pdf [file 41467_2020_16213_MOESM1_ESM.pdf]

**Supplementary Information**

**Structural basis for impairment of DNA methylation by the DNMT3A R882H mutation**

Hiwot Anteneh et al.

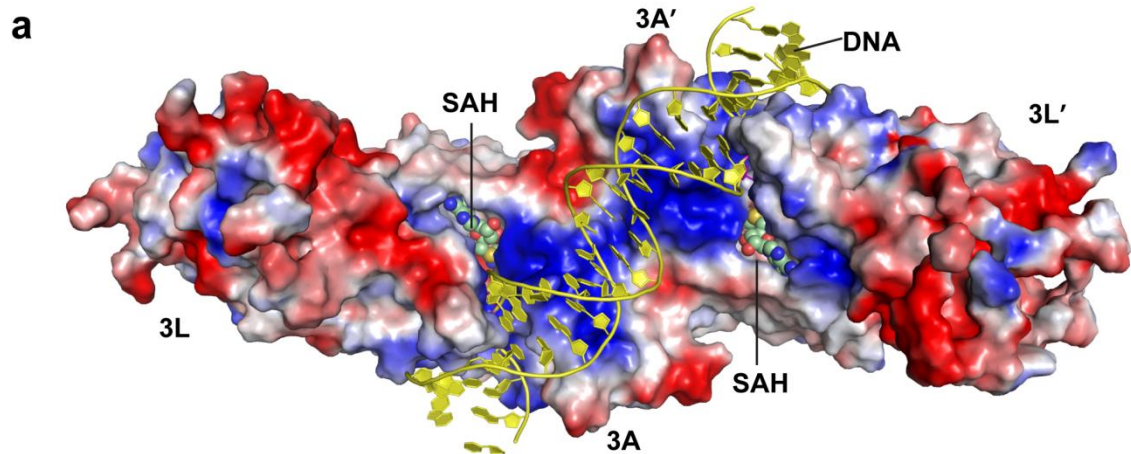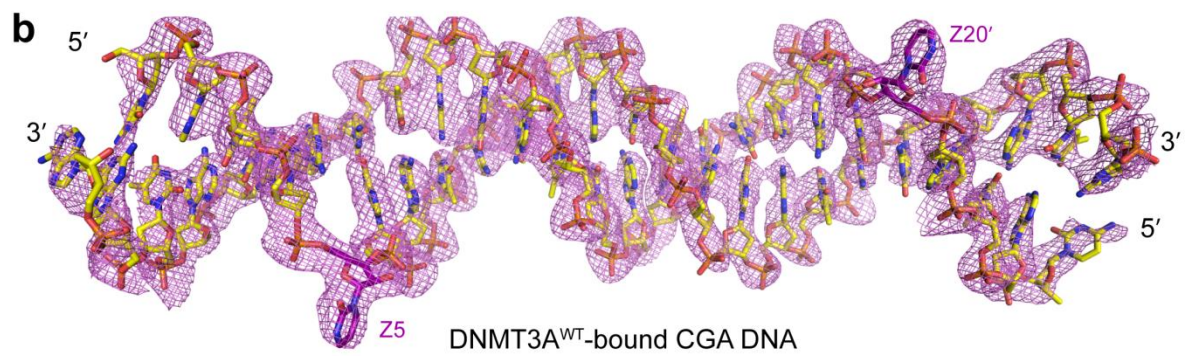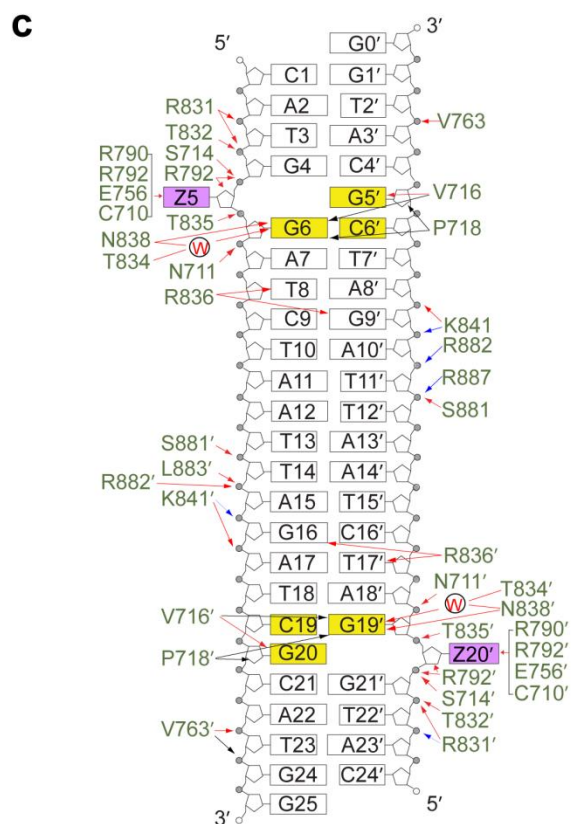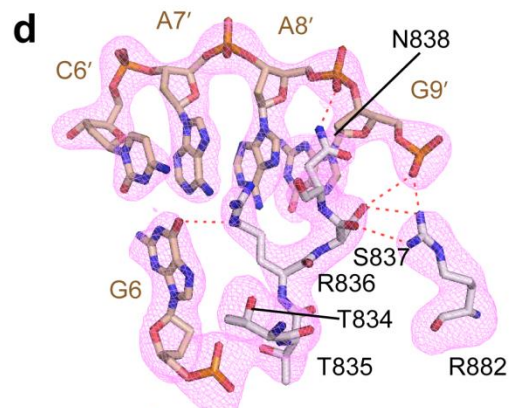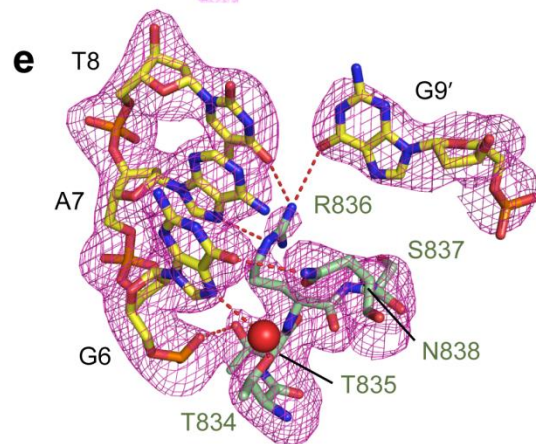

**Supplementary Figure 1. Structural details of the DNMT3A<sup>WT</sup>-CGA and DNMT3A<sup>WT</sup>-CGT complexes.** (a) Electrostatic surface of DNMT3A<sup>WT</sup>-DNMT3L tetramer bound to CGA DNA. (b) Fo-Fc omit map (violet) of the CGA DNA (sticks) bound to DNMT3A<sup>WT</sup>, contoured at 2.0 sigma level. (c) Schematic view of the DNMT3A<sup>WT</sup>-DNA interactions in the DNMT3A<sup>WT</sup>-CGA complex. The hydrogen-bonding, electrostatic and van der Waals interactions are indicated by red, blue and black arrows, respectively. The water-mediated hydrogen bond is indicated by letter 'W'. (d,e) Close-up views of the DNA interactions of the TRD loop in the DNMT3A<sup>WT</sup>-CGT (d) and DNMT3A<sup>WT</sup>-CGA (e) complexes. The hydrogen bonding interactions are indicated by dashed lines. The Fo-Fc omit maps (violet) for the interacting DNAs are contoured at 2.0 sigma level.

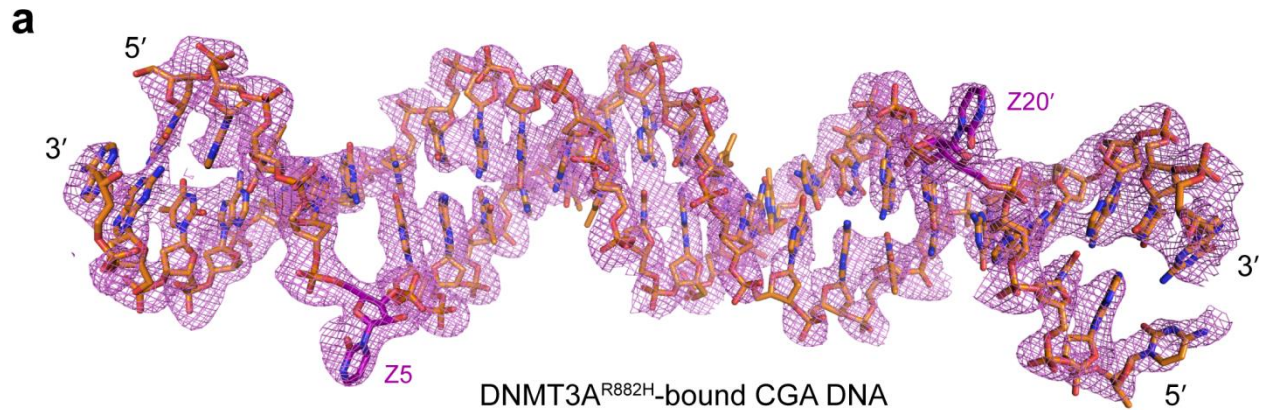

**b**

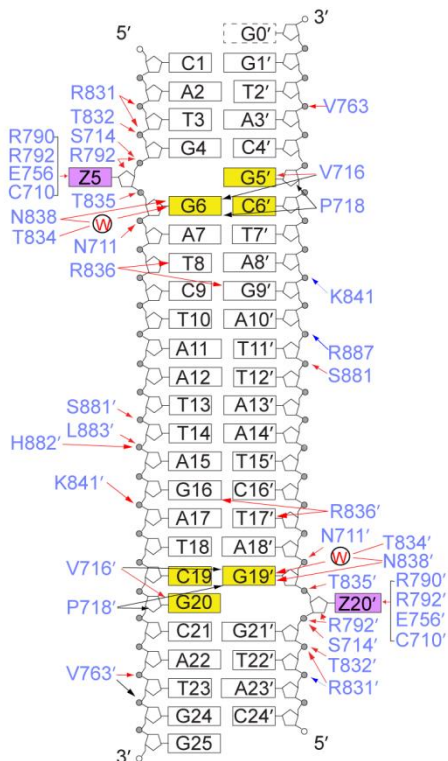

**c**

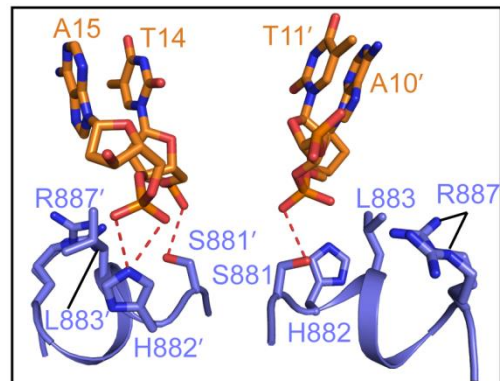

**Supplementary Figure 2. Structural analysis of the DNMT3A<sup>R882H</sup>-CGA complex.** (a) Fo-Fc omit map (violet) of the CGA DNA (sticks) bound to DNMT3A<sup>R882H</sup>, contoured at 2.0 sigma level. (b) Schematic view of the DNMT3A<sup>R882H</sup>-DNA interactions in the DNMT3A<sup>R882H</sup>-CGA complex. The hydrogen-bonding, electrostatic and van der Waals interactions are indicated by red, blue and black arrows, respectively. The water-mediated hydrogen bond is indicated by letter 'W'. (c) Close-up view of the interactions between the RD interface and DNA in the DNMT3A<sup>R882H</sup>-CGA complex. The hydrogen-bonding interactions are shown as dashed lines.



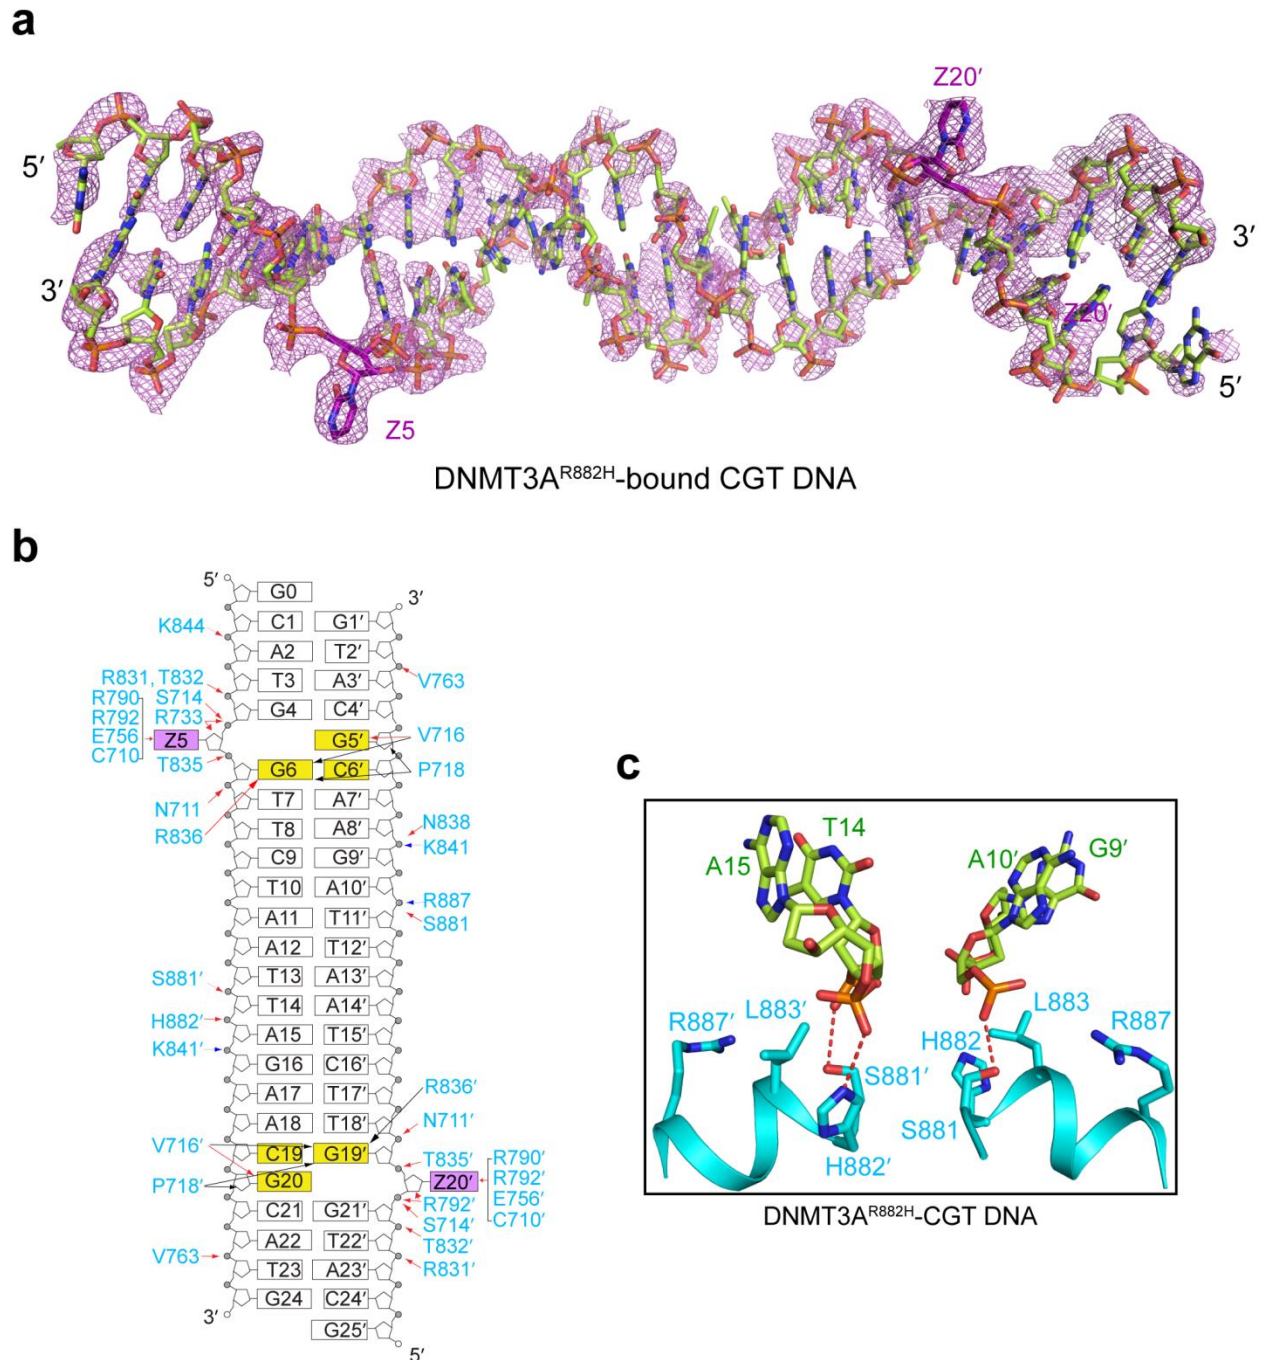

**Supplementary Figure 3. Structural details of the DNMT3A<sup>R882H</sup>-CGT complex. (a)** Fo-Fc omit map (violet) of the CGT DNA (sticks) bound to DNMT3A<sup>R882H</sup>, contoured at 2.0 sigma level. **(b)** Schematic views of the protein-DNA interactions in the DNMT3A<sup>R882H</sup>-CGT complex. The hydrogen-bonding, electrostatic and van der Waals interactions are indicated by red, blue and black arrows, respectively. **(c)** Close-up view of the interaction between the RD interface and DNA in the DNMT3A<sup>R882H</sup>-CGT complex. The hydrogen bonding interactions are shown as dashed lines.





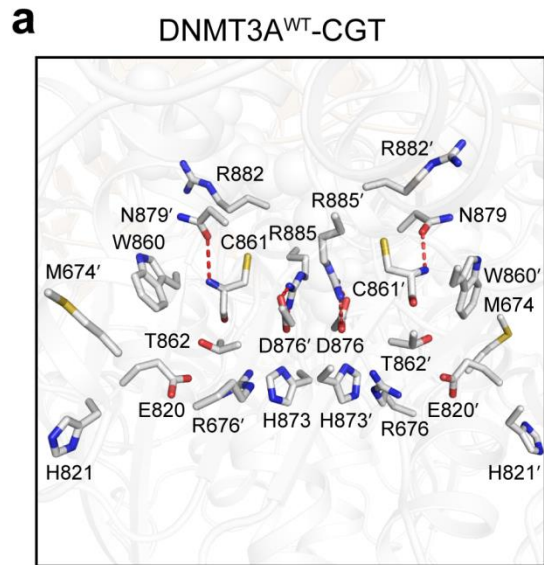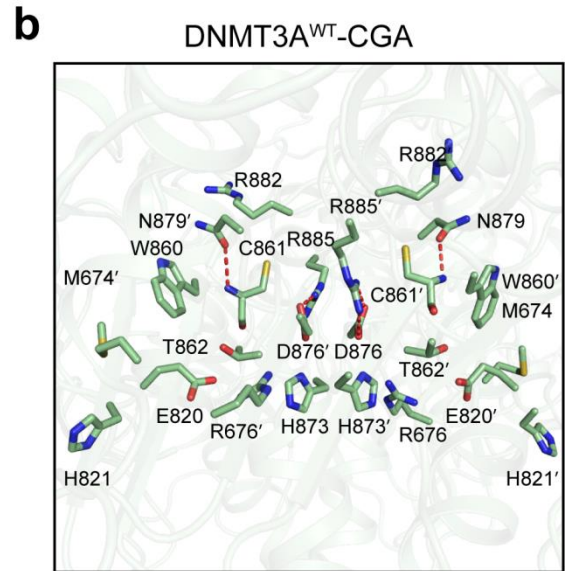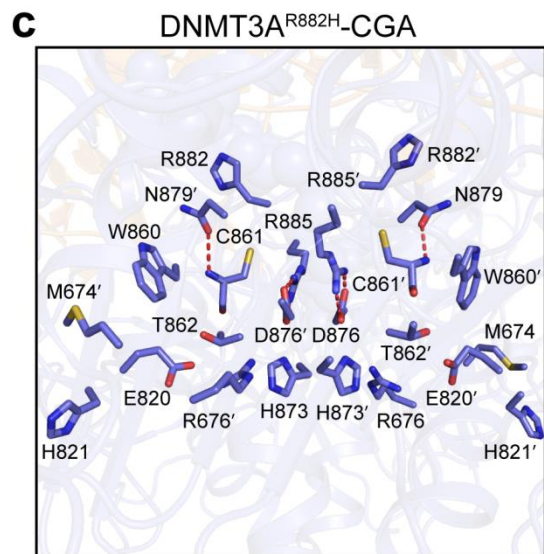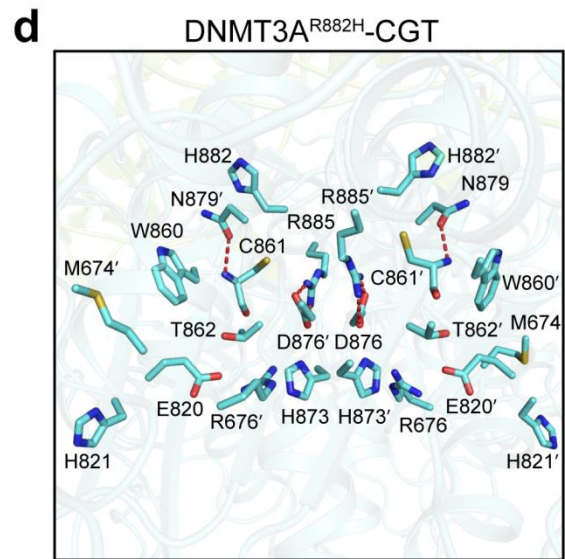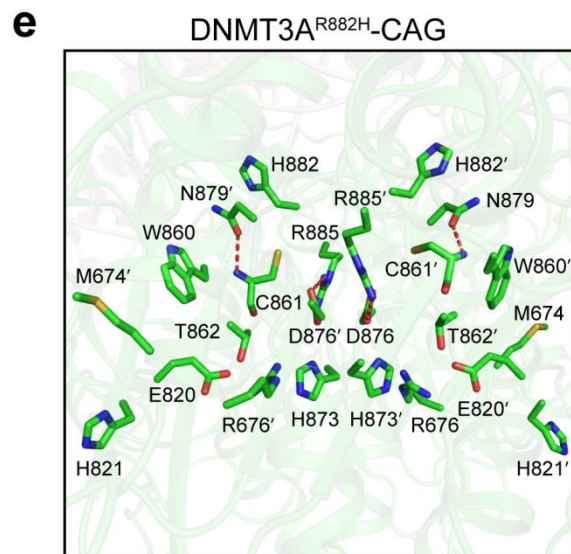

**Supplementary Figure 5. Intermolecular interactions at the RD interfaces of DNMT3A-DNA complexes. (a-e)** Stick representations of protein residues located at the RD interfaces of the DNMT3A<sup>WT</sup>-CGT (PDB 5YX2 [<https://www.rcsb.org/structure/5YX2>]) (a), DNMT3A<sup>WT</sup>-CGA (b), DNMT3A<sup>R882H</sup>-CGA (c), DNMT3A<sup>R882H</sup>-CGT (d) and DNMT3A<sup>R882H</sup>-CAG (e) complexes. The hydrogen bonding interactions are shown as dashed lines.



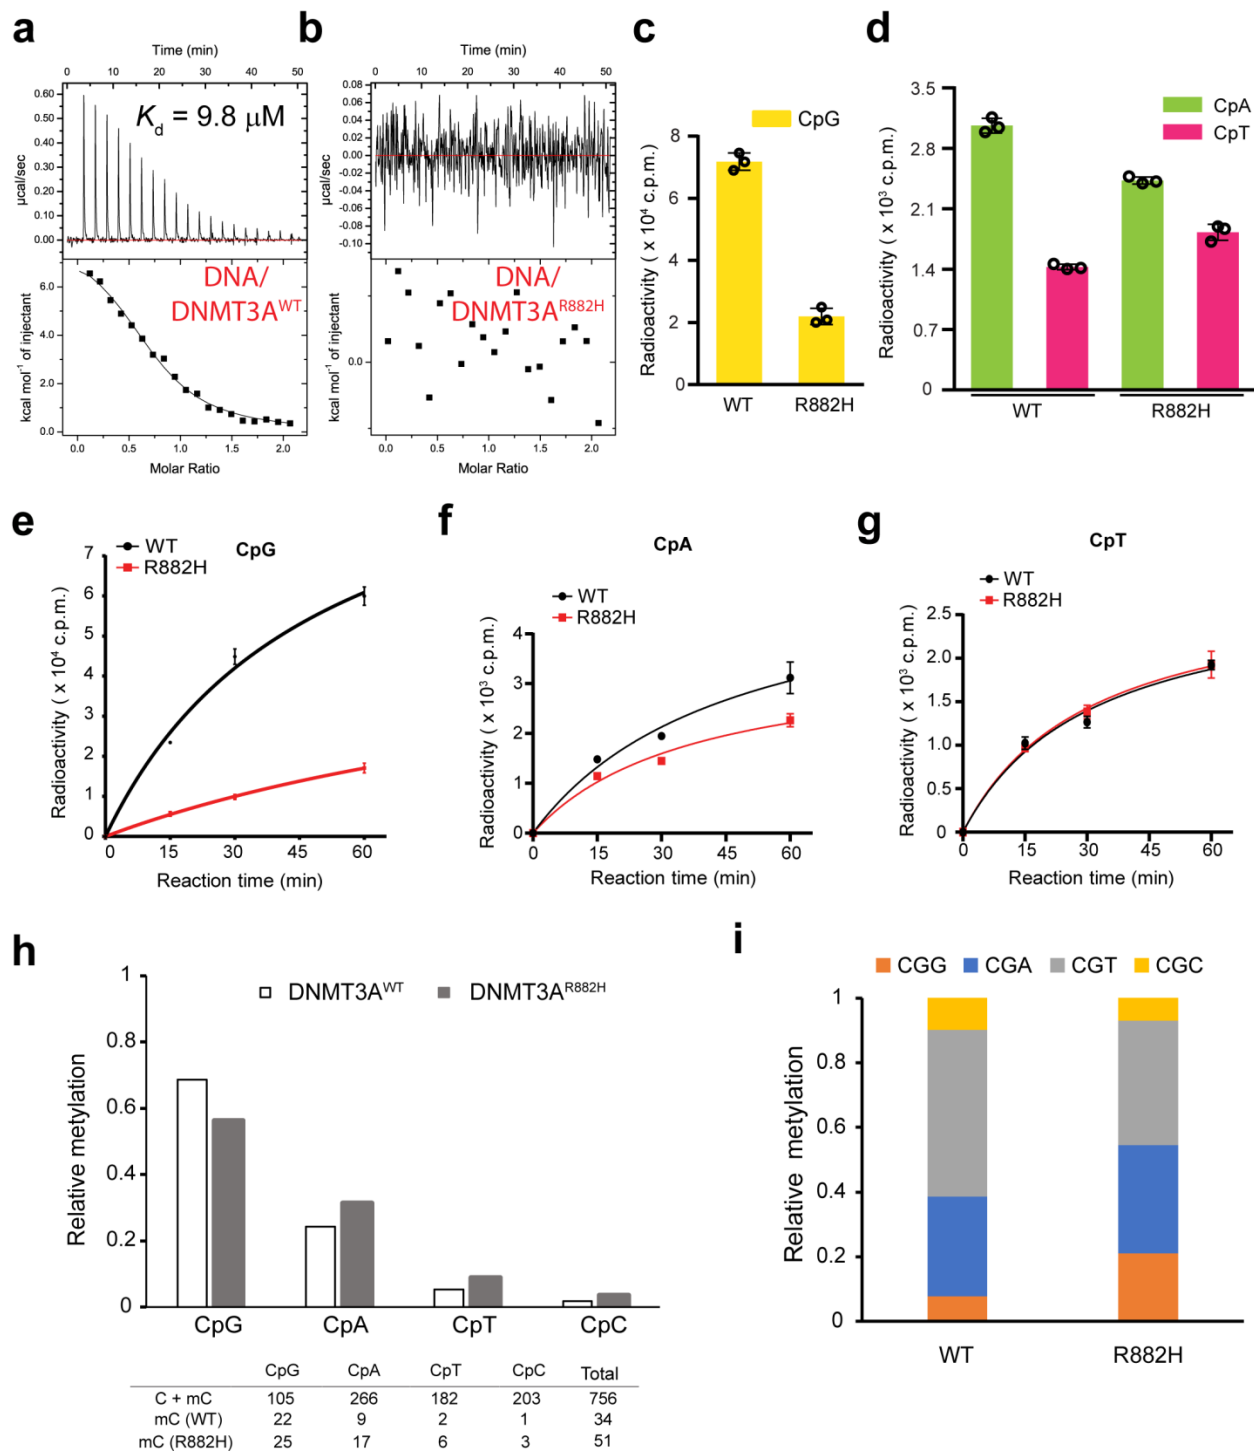

**Supplementary Figure 6. Biochemical and enzymatic analyses of the DNMT3A<sup>R882H</sup>- and DNMT3A<sup>WT</sup>-mediated methylation. (a,b)** Representative ITC binding curves of DNMT3A<sup>WT</sup> (a) and DNMT3A<sup>R882H</sup> (b) titrated against (GAC)<sub>8</sub> DNA. **(c)** *In vitro* CpG methylation of DNMT3A<sup>R882H</sup>-DNMT3L and DNMT3A<sup>WT</sup>-DNMT3L on a 36-

mer DNA containing single CpG site. **(d)** *In vitro* CpA and CpT methylation of DNMT3A<sup>R882H</sup>-DNMT3L and DNMT3A<sup>WT</sup>-DNMT3L on a 36-mer DNA containing single CpA or CpT site. **(e-g)** *In vitro* methylation kinetics of DNMT3A<sup>WT</sup>-DNMT3L and DNMT3A<sup>R882H</sup>-DNMT3L over (e) CpG, (f) CpA and (g) CpT DNA. The experiment in (e-g) was performed independently from (c,d). **(h)** Biological replicate of the bisulfite sequencing analysis in Figure 6d. (Top) Relative *in vitro* CpG and CpH methylation of WT and R882H-mutated DNMT3A-DNMT3L on a 626-bp DNA. The data are displayed as ratios of the methylation events of each indicated sequence context over total methylation events. (Bottom) Summary of total cytosine sites and methylation events in each indicated context, derived from bisulfite sequencing analyses of 7 clones of the 626-bp DNA incubated with WT or R882H-mutated DNMT3A-DNMT3L. Note that each DNA fragment contains 15 CpG, 38 CpA, 26 CpT and 29 CpC sites. **(i)** Relative ratio of methylation efficiency of DNMT3A<sup>R882H</sup>-DNMT3L and DNMT3A<sup>WT</sup>-DNMT3L for indicated sequence contexts on the 626 bp-long DNA. The experiment was repeated once with consistent results. In (c-g), n = 3 biological replicates. Data are mean ± s.d.

**Supplementary Table 1. X-ray data collection and refinement statistics.**

|                                                     | DNMT3A <sup>R882H</sup> –<br>DNMT3L–CGT<br>DNA<br>(PDB: 6W8D) | DNMT3A <sup>R882H</sup> –<br>DNMT3L–CGA<br>DNA<br>(PDB: 6W89) | DNMT3A <sup>R882H</sup> –<br>DNMT3L–CAG<br>DNA<br>(PDB: 6W8J) | DNMT3A <sup>WT</sup> –<br>DNMT3L–CGA<br>DNA<br>(PDB: 6W8B) |
|-----------------------------------------------------|---------------------------------------------------------------|---------------------------------------------------------------|---------------------------------------------------------------|------------------------------------------------------------|
| <b>Data collection</b>                              |                                                               |                                                               |                                                               |                                                            |
| Space group                                         | H 3                                                           | P 3 <sub>2</sub>                                              | H 3                                                           | P 3 <sub>2</sub>                                           |
| Cell dimensions                                     |                                                               |                                                               |                                                               |                                                            |
| <i>a, b, c</i> (Å)                                  | 205.6, 205.6, 89.5                                            | 187.6, 187.6, 82.4                                            | 205.9, 205.9, 89.4                                            | 186.3, 186.3, 81.7                                         |
| $\alpha, \beta, \gamma$ (°)                         | 90, 90, 120                                                   | 90, 90, 120                                                   | 90, 90, 120                                                   | 90, 90, 120                                                |
| Resolution (Å)                                      | 33.16–2.60(2.69–<br>2.60) <sup>a</sup>                        | 37.72–2.50(2.59–<br>2.50)                                     | 43.35–2.45(2.54–<br>2.45)                                     | 46.59–2.40(2.49–<br>2.40)                                  |
| <i>R</i> <sub>merge</sub>                           | 0.051(1.155)                                                  | 0.078(0.818)                                                  | 0.112(1.496)                                                  | 0.074(1.249)                                               |
| <i>I</i> / $\sigma$ ( <i>I</i> )                    | 13.7(0.9)                                                     | 10.4(1.4)                                                     | 7.8(1.9)                                                      | 10.0(0.8)                                                  |
| <i>CC</i> <sub>1/2</sub>                            | 0.998(0.636)                                                  | 0.999(0.726)                                                  | 0.992(0.404)                                                  | 0.999(0.644)                                               |
| Completeness (%)                                    | 98.9(99.5)                                                    | 98.5(93.0)                                                    | 100.0(99.9)                                                   | 99.9(99.9)                                                 |
| Redundancy                                          | 5.1(4.9)                                                      | 6.7(5.9)                                                      | 4.8(4.6)                                                      | 5.1(4.7)                                                   |
| <b>Refinement</b>                                   |                                                               |                                                               |                                                               |                                                            |
| No. reflections                                     | 43,403                                                        | 110,518                                                       | 51,900                                                        | 123,895                                                    |
| <i>R</i> <sub>work</sub> / <i>R</i> <sub>free</sub> | 0.199/0.253                                                   | 0.196/0.240                                                   | 0.183/0.223                                                   | 0.212/0.233                                                |
| No. atoms                                           |                                                               |                                                               |                                                               |                                                            |
| Protein and DNA                                     | 8,238                                                         | 16,730                                                        | 8,330                                                         | 16,745                                                     |
| SAH                                                 | 52                                                            | 104                                                           | 52                                                            | 104                                                        |
| Water                                               | 96                                                            | 259                                                           | 151                                                           | 288                                                        |
| <i>B</i> factors (Å <sup>2</sup> )                  |                                                               |                                                               |                                                               |                                                            |
| DNMT3A                                              | 89.9                                                          | 65.2                                                          | 77.4                                                          | 70.9                                                       |
| DNMT3L                                              | 140.2                                                         | 124.0                                                         | 125.9                                                         | 130.8                                                      |
| DNA                                                 | 158.4                                                         | 120.0                                                         | 129.8                                                         | 116.8                                                      |
| SAH                                                 | 89.1                                                          | 60.1                                                          | 80.6                                                          | 66.6                                                       |
| Water                                               | 88.5                                                          | 68.8                                                          | 83.2                                                          | 68.1                                                       |
| r.m.s deviations                                    |                                                               |                                                               |                                                               |                                                            |
| Bond lengths (Å)                                    | 0.004                                                         | 0.006                                                         | 0.004                                                         | 0.004                                                      |
| Bond angles (°)                                     | 0.703                                                         | 0.968                                                         | 0.708                                                         | 0.675                                                      |

<sup>a</sup>Values in parentheses are for highest-resolution shell. Each structure was determined using the dataset collected from a single crystal.

**Supplementary Table 2. Summary of primer sequences.**

| Name            | Sequence                                        | Notes                                                  |
|-----------------|-------------------------------------------------|--------------------------------------------------------|
| DNMT3A(R882H)_F | CAATATGAGCCATCTGGCACGTCAGCGT                    | DNMT3A R882H mutation                                  |
| DNMT3A(R882H)_R | TGCCAGATGGCTCATATTGCTAACATCGG                   | DNMT3A R882H mutation                                  |
| DNMT3A_MTase_F  | CGCGGCGGTCTCGGATCCGCAGAAAAACGT<br>AAACCGATTCGTG | Cloning of DNMT3A MTase domain<br>into pRSFDuet-1      |
| DNMT3A_MTase_R  | GGCGGCGGCGCCGCTTAAACGCAGGCAAAA<br>TATTC         | Cloning of DNMT3A MTase domain<br>into pRSFDuet-1      |
| DNMT3L_F        | CGCGGCCATATGATGTTTCGAAACCGTGCCT<br>GTG TGG      | Cloning of DNMT3L C-terminal<br>domain into pRSFDuet-1 |
| DNMT3L_R        | CGCGGCGGTCTCCTCGAGTTATAAAGAGGA<br>AGTGAGTTCTG   | Cloning of DNMT3L C-terminal<br>domain into pRSFDuet-1 |
| GST3-F          | TTGAAGAAAAATATGAAGAGGATTTGTATG<br>AG            | Bisulfite sequencing analysis                          |
| GST3-R          | CCCCTCCAACACAACCTCC                             | Bisulfite sequencing analysis                          |
